# Supplementary material for: Proteomic analyses reveal misregulation of LIN28 expression and delayed timing of glial differentiation in human iPS cells with MECP2 loss-of-function
Source: PubMed Central journal article supplement (PMC6383942; doi:10.1371/journal.pone.0212553), 2019-02-21
Supplement: pone.0212553.s002.pdf [file pone.0212553.s002.pdf]

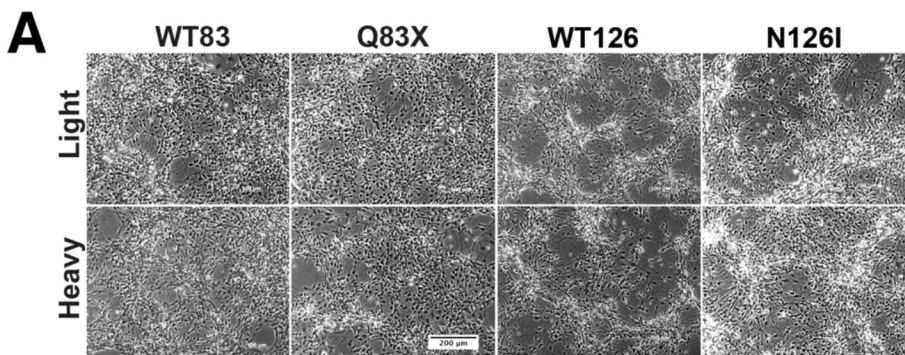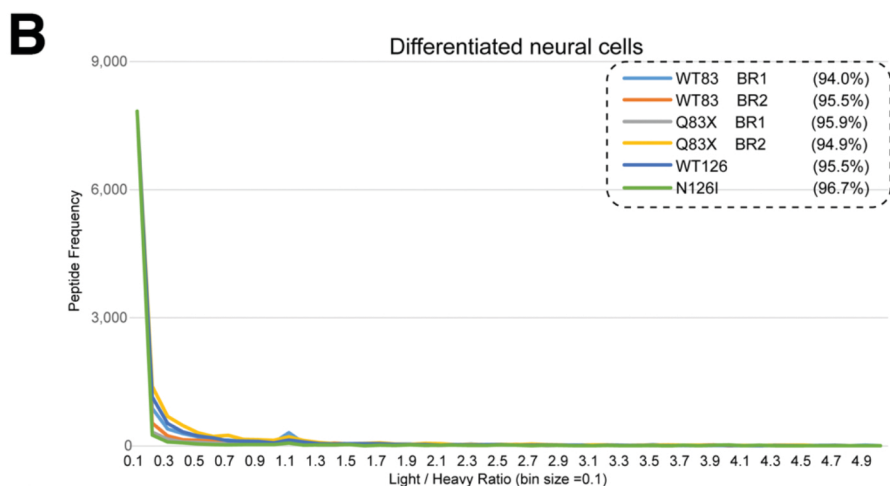

**C**

Proteins mapped to mouse neuron-specific genes

| Gene           | Ratio of Ratios (RoR) |         |        |         | Label Swap (LS) |         |        |         |
|----------------|-----------------------|---------|--------|---------|-----------------|---------|--------|---------|
|                | Q83X                  |         | N126I  |         | Q83X            |         | N126I  |         |
|                | Ratio                 | p-value | Ratio  | p-value | Ratio           | p-value | Ratio  | p-value |
| <b>Odz2</b>    | 0.032                 | 0.912   | NA     | X       | -0.168          | 0.039   | 1.496  | 0.000   |
| <b>Myt1l</b>   | NA                    | X       | NA     | X       | 0.888           | 0.203   | 0.722  | X       |
| <b>Gabrg2</b>  | NA                    | X       |        |         | -0.059          | 0.412   |        |         |
| <b>Plicxd3</b> | -1.411                | X       | 0.104  | X       | -1.286          | X       | 0.202  | X       |
| <b>Snap25</b>  | -0.901                | 0.000   | -0.263 | 0.007   | -0.737          | 0.000   | -0.136 | 0.005   |
| <b>Pgm211</b>  | -0.604                | 0.003   | 0.317  | 0.000   | -0.396          | 0.000   | 0.202  | 0.013   |
| <b>Stmn2</b>   | -0.775                | 0.000   | -0.200 | 0.024   | -0.234          | 0.062   | -0.120 | 0.053   |
| <b>Prdm8</b>   |                       |         | NA     | X       | 1.251           | X       |        |         |
| <b>Gira2</b>   | -0.501                | X       | 0.086  | 0.560   | -0.556          | 0.060   | 0.263  | 0.297   |
| <b>Calb1</b>   | -0.274                | 0.080   | -0.207 | 0.618   | -1.059          | 0.001   | -0.120 | 0.342   |
| <b>Syt1</b>    | -0.488                | 0.000   | -0.246 | 0.000   | -0.246          | 0.000   | -0.105 | 0.001   |
| <b>Scg2</b>    | -0.931                | 0.000   | 0.317  | 0.000   | -0.340          | 0.000   | 0.401  | 0.000   |

Proteins mapped to mouse astrocyte-specific genes

| Gene          | Ratio of Ratios (RoR) |         |        |         | Label Swap (LS) |         |        |         |
|---------------|-----------------------|---------|--------|---------|-----------------|---------|--------|---------|
|               | Q83X                  |         | N126I  |         | Q83X            |         | N126I  |         |
|               | Ratio                 | p-value | Ratio  | p-value | Ratio           | p-value | Ratio  | p-value |
| <b>S100b</b>  | -1.280                | 0.000   | -1.399 | 0.000   | -0.786          | 0.000   | -1.415 | 0.000   |
| <b>Aldoc</b>  | -1.021                | 0.000   | 0.132  | 0.106   | -0.535          | 0.000   | -0.029 | 0.154   |
| <b>Gfap</b>   | -3.489                | 0.034   | -0.924 | 0.000   | -2.943          | 0.001   | -1.218 | 0.000   |
| <b>Slc1a3</b> | 1.258                 | 0.341   | -0.135 | 0.188   | 1.245           | 0.159   | -0.234 | 0.000   |
| <b>Atp1a2</b> | -0.749                | 0.001   | -0.332 | 0.000   | -0.535          | 0.006   | -0.152 | 0.000   |
| <b>Prodh</b>  |                       |         | NA     | X       |                 |         | 0.934  | 0.001   |
| <b>Slc1a2</b> | -0.658                | 0.081   | 1.072  | 0.098   | -0.322          | 0.000   | 0.070  | 0.868   |

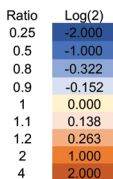

Proteins mapped to mouse oligodendrocyte-specific genes

| Gene        | Ratio of Ratios (RoR) |         |        |         | Label Swap (LS) |         |        |         |
|-------------|-----------------------|---------|--------|---------|-----------------|---------|--------|---------|
|             | Q83X                  |         | N126I  |         | Q83X            |         | N126I  |         |
|             | Ratio                 | p-value | Ratio  | p-value | Ratio           | p-value | Ratio  | p-value |
| <b>Pip1</b> | NA                    | X       | -1.127 | X       | 0.379           | 0.316   | -0.621 | X       |
