# Supplementary material for: Proteomic analyses reveal misregulation of LIN28 expression and delayed timing of glial differentiation in human iPS cells with MECP2 loss-of-function
Source: PubMed Central journal article supplement (PMC6383942; doi:10.1371/journal.pone.0212553), 2019-02-21

**A**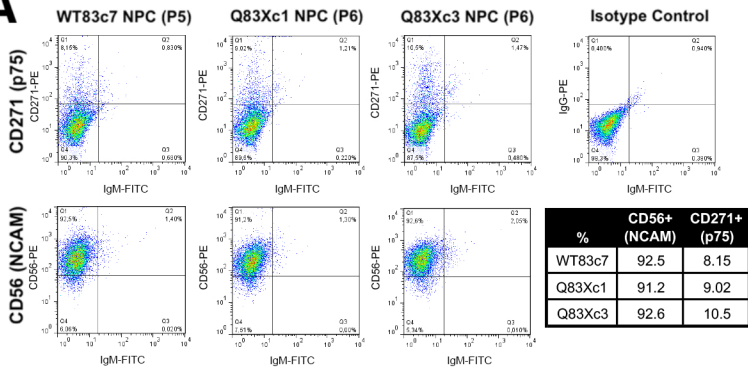**B**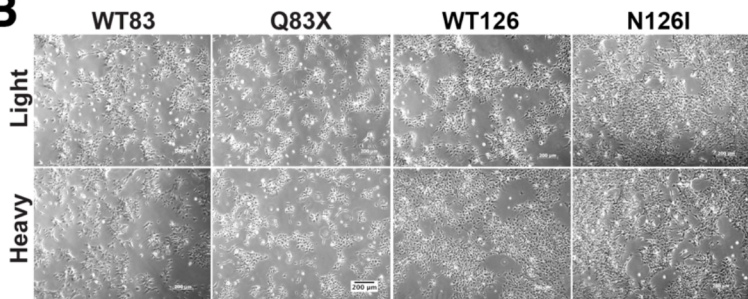**C**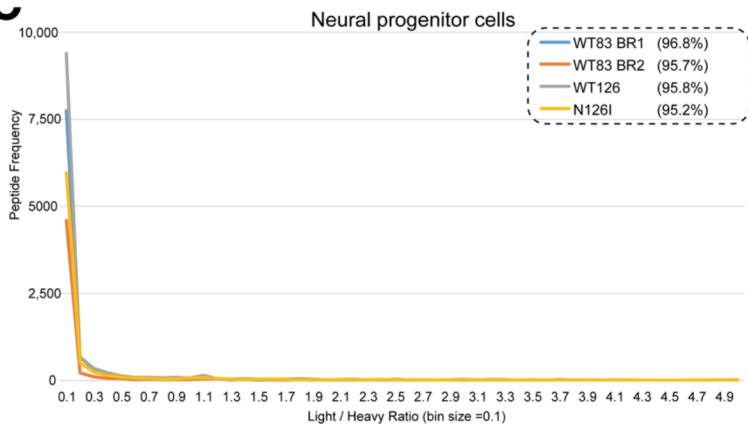**D**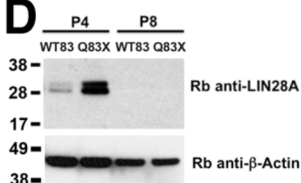**E**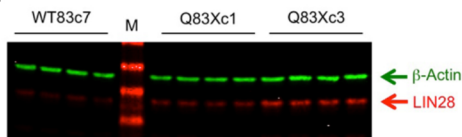

Supplement: pone.0212553.s003.pdf [file pone.0212553.s003.pdf]
