# Supplementary material for: Proteomic analyses reveal misregulation of LIN28 expression and delayed timing of glial differentiation in human iPS cells with MECP2 loss-of-function
Source: PubMed Central journal article supplement (PMC6383942; doi:10.1371/journal.pone.0212553), 2019-02-21
Supplement: pone.0212553.s005.pdf [file pone.0212553.s005.pdf]

**A** Early Pseudotime Markers from Sloan et al. (2017)  
Cluster 1 (enriched at early pseudotimes)

| Gene     | Ratio of Ratios (RoR) |         |        |         | Label Swap (LS) |         |        |         |
|----------|-----------------------|---------|--------|---------|-----------------|---------|--------|---------|
|          | Q83X                  |         | N126I  |         | Q83X            |         | N126I  |         |
|          | Ratio                 | p-value | Ratio  | p-value | Ratio           | p-value | Ratio  | p-value |
| PLS3     | -1.442                | 0.052   | -0.767 | 0.096   | 0.029           | 0.654   | -0.556 | 0.000   |
| ANXA2    | -0.301                | 0.000   | -0.181 | 0.044   | -0.515          | 0.000   | -0.120 | 0.001   |
| CTSC     | 0.356                 | 0.000   | 0.451  | 0.000   | 0.000           | 0.548   | 0.333  | 0.000   |
| EBF2     |                       |         | NA     | X       |                 |         |        |         |
| ACTG2    | -0.391                | 0.000   | 0.014  | 0.574   | -0.252          | 0.000   | 0.000  | 0.616   |
| CNTNAP2  | -1.285                | 0.000   | 0.475  | 0.008   | -0.535          | 0.000   | 0.401  | 0.002   |
| DCX      | -0.598                | 0.000   | -0.097 | 0.000   | -0.286          | 0.000   | -0.014 | 0.275   |
| FBLN1    | NA                    | X       |        |         |                 |         |        |         |
| RRM2     | NA                    | X       | -0.884 | 0.003   | -0.515          | X       | -0.494 | 0.037   |
| INA      | -0.675                | 0.000   | -0.056 | 0.001   | -0.474          | 0.000   | -0.059 | 0.000   |
| NCAPH    | 1.209                 | 0.012   | -0.354 | 0.208   | 0.566           | 0.109   | -0.474 | 0.000   |
| CRABP1   | 0.475                 | 0.000   | 0.132  | 0.000   | 0.251           | 0.000   | 0.057  | 0.070   |
| TIMELESS |                       |         | NA     | X       |                 |         |        |         |
| NEFL     | -1.322                | 0.000   | -0.284 | 0.000   | -0.434          | 0.000   | -0.105 | 0.000   |
| FAM105A  |                       |         | 0.863  | X       |                 |         | -0.396 | 0.028   |
| GINS2    | NA                    | X       | NA     | X       | 1.098           | 0.407   | -0.494 | 0.230   |
| UBE2C    | NA                    | X       |        |         | 1.379           | X       | -1.000 | 0.009   |
| PBK      | 1.510                 | X       | -1.267 | X       | 1.390           | X       | -0.889 | X       |
| GPR50    | NA                    | X       | -0.637 | X       | 0.799           | 0.000   | 0.632  | X       |
| DNMT3B   | NA                    | X       |        |         | 0.287           | 0.002   |        |         |
| ELAVL4   | 0.366                 | 0.006   | -0.593 | 0.000   | -0.089          | 0.045   | -0.713 | 0.000   |

**B** Middle Pseudotime Markers from Sloan et al. (2017)  
Cluster 2 (enriched at middle pseudotimes)

| Gene     | Ratio of Ratios (RoR) |         |          |         | Label Swap (LS) |         |          |         |
|----------|-----------------------|---------|----------|---------|-----------------|---------|----------|---------|
|          | Q83X                  |         | N126I    |         | Q83X            |         | N126I    |         |
|          | Ratio                 | p-value | Ratio    | p-value | Ratio           | p-value | Ratio    | p-value |
| SLC2A1   | 0.635                 | X       | NA       | X       | -0.074          | 0.101   | -0.556   | 0.001   |
| RTN1     | -0.691                | 0.000   | -0.475   | 0.000   | -0.269          | 0.000   | -0.474   | 0.000   |
| ATP1A2   | -0.749                | 0.001   | -0.332   | 0.000   | -0.535          | 0.006   | -0.152   | 0.000   |
| C9orf126 | 0.068                 | X       | 0.903    | X       | -0.201          | 0.004   | -0.136   | 0.074   |
| DPH2     | 0.291                 | X       | 0.229    | X       | 0.202           | 0.524   | -0.152   | 0.284   |
| CLU      |                       |         | -1.273   | X       | -0.252          | X       | -1.089   | 0.012   |
| SLC1A3   | 1.258                 | 0.341   | -0.135   | 0.188   | 1.245           | 0.159   | -0.234   | 0.000   |
| ALDOC    | -1.021                | 0.000   | 0.132    | 0.106   | -0.535          | 0.000   | -0.029   | 0.154   |
| AKR1C3   | -0.539                | X       | -0.103   | 0.410   | -0.644          | X       | -0.201   | 0.028   |
| NEK      | Multiple              | X       | Multiple | X       | Multiple        | X       | Multiple | X       |
| PTN      | 0.282                 | 0.462   | 0.663    | 0.335   | 0.604           | 0.203   | 1.239    | 0.137   |
| NTRK2    | -0.210                | 0.085   | 0.181    | 0.020   | 0.566           | 0.038   | -0.014   | 0.409   |
| SCUBE2   | NA                    | X       | -1.317   | 0.133   | -0.120          | 0.294   | -0.811   | 0.002   |
| TNC      | NA                    | X       | 0.397    | 0.006   |                 |         | 0.345    | 0.000   |

**C** Late Pseudotime Markers from Sloan et al. (2017)  
Cluster 3 (enriched at late pseudotimes)

| Gene   | Ratio of Ratios (RoR) |         |        |         | Label Swap (LS) |         |        |         |
|--------|-----------------------|---------|--------|---------|-----------------|---------|--------|---------|
|        | Q83X                  |         | N126I  |         | Q83X            |         | N126I  |         |
|        | Ratio                 | p-value | Ratio  | p-value | Ratio           | p-value | Ratio  | p-value |
| PLTP   |                       |         | NA     | X       |                 |         | -0.889 | X       |
| PPAP2B |                       |         |        |         | -2.184          | X       |        |         |
| CHL1   | -0.590                | 0.050   | -1.104 | X       | -0.152          | 0.025   | -0.737 | X       |
| HTRA1  | NA                    | X       | -0.841 | 0.023   | -0.152          | X       | -1.252 | 0.001   |
| ENDOD1 | 0.303                 | 0.218   | 0.089  | 0.693   | -0.168          | 0.007   | 0.263  | 0.002   |
| CSRP1  | 0.621                 | 0.007   | NA     | X       | 0.485           | 0.022   | -0.644 | 0.000   |
| GPC5   | NA                    | X       |        |         | -1.184          | X       |        |         |
| GATM   | -0.702                | 0.000   | -1.896 | 0.186   | -0.252          | 0.063   | -0.862 | 0.000   |
| ACSS1  |                       |         | NA     | X       |                 |         | -0.252 | 0.269   |
| BCAN   | -3.733                | X       | -0.453 | 0.103   | 0.163           | 0.787   | -0.322 | 0.038   |
| VSNL1  | -1.184                | 0.000   | -0.448 | 0.351   | -1.059          | 0.000   | 0.138  | 0.804   |
| GFRA1  | NA                    | X       | 0.864  | 0.240   | -0.184          | 0.310   | 0.566  | 0.124   |
| DBC1   | NA                    | X       | NA     | X       | -0.786          | X       | -0.120 | 0.626   |
| APOE   |                       |         |        |         | 2.755           | 0.151   |        |         |
| MOXD1  |                       |         | NA     | X       | -0.269          | 0.005   |        |         |
| SLC1A2 | -0.658                | 0.081   | 1.072  | 0.098   | -0.322          | 0.000   | 0.070  | 0.868   |
| TPP1   | -0.332                | 0.032   | -0.278 | 0.002   | -0.168          | 0.029   | -0.286 | 0.000   |
| GSN    | -0.376                | 0.002   | -0.341 | 0.000   | -0.396          | 0.000   | -0.474 | 0.000   |

**D** Mature Astrocyte Markers from Sloan et al. (2017)  
Genes enriched in primary mature astrocytes / hCS astrocytes

| Gene    | Ratio of Ratios (RoR) |         |        |         | Label Swap (LS) |         |        |         | Ratio | Log(2) |
|---------|-----------------------|---------|--------|---------|-----------------|---------|--------|---------|-------|--------|
|         | Q83X                  |         | N126I  |         | Q83X            |         | N126I  |         |       |        |
|         | Ratio                 | p-value | Ratio  | p-value | Ratio           | p-value | Ratio  | p-value |       |        |
| S100A13 | -0.106                | 0.806   |        |         | -0.120          | 0.286   | -0.029 | 0.378   | 0.25  | -2.000 |
| ALDH1A1 |                       |         |        |         | 0.926           | X       |        |         | 0.5   | -1.000 |
| CSRP1   | 0.621                 | 0.007   |        |         | 0.485           | 0.022   | -0.644 | 0.000   | 0.8   | -0.322 |
| GSTM5   |                       |         | -2.822 | 0.001   |                 |         | -2.322 | 0.010   | 0.9   | -0.152 |
| APOC1   |                       |         |        |         | -0.415          | 0.243   |        |         | 1     | 0.000  |
| CPNE6   |                       |         | -0.648 | X       |                 |         | -0.578 | 0.000   | 1.1   | 0.138  |
| UCLH5   | -0.354                | 0.273   | 0.243  | 0.468   | -0.184          | 0.047   | -0.396 | 0.107   | 1.2   | 0.263  |
| ME1     | NA                    | X       | 0.908  | 0.000   | -0.599          | 0.033   | 0.465  | 0.000   | 2     | 1.000  |
| SLG1A2  | -0.658                | 0.081   | 1.072  | 0.098   | -0.322          | 0.000   | 0.070  | 0.868   | 4     | 2.000  |
