# Supplementary material for: Proteomic analyses reveal misregulation of LIN28 expression and delayed timing of glial differentiation in human iPS cells with MECP2 loss-of-function
Source: PubMed Central journal article supplement (PMC6383942; doi:10.1371/journal.pone.0212553), 2019-02-21

**A****Before ZFN****After ZFN****After clonal selection****MECP2**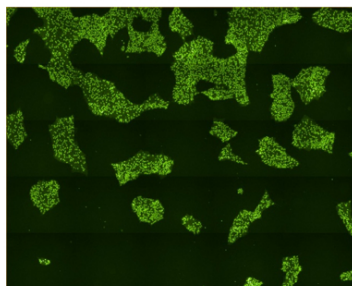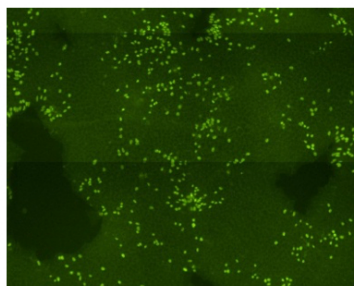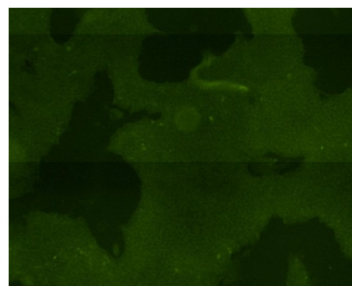**MECP2<sup>+/-</sup> hESCs****MECP2<sup>-/-</sup> hESCs****B**

ddPCR quantification of cassette insertion #

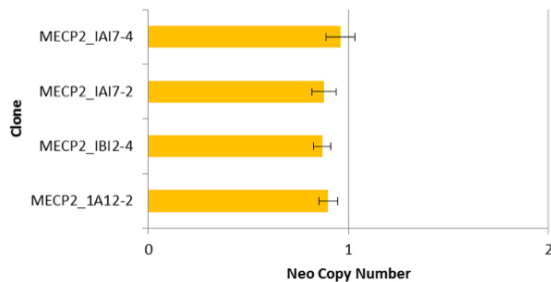**C**

| Clone        | Assay     | Copy Number | Poisson error (relative) | Neo copies per haploid genome | Error |
|--------------|-----------|-------------|--------------------------|-------------------------------|-------|
| MECP2 1A12-2 | Neo-FAM   | 241         | 0.037                    | 0.9                           | 0.048 |
| MECP2 1A12-2 | RPPH1-VIC | 538         | 0.030                    |                               |       |
| MECP2 IBI2-4 | Neo-FAM   | 320         | 0.034                    | 0.87                          | 0.043 |
| MECP2 IBI2-4 | RPPH1-VIC | 737         | 0.026                    |                               |       |
| MECP2_IAI7-2 | Neo-FAM   | 159         | 0.050                    | 0.88                          | 0.060 |
| MECP2_IAI7-2 | RPPH1-VIC | 361         | 0.033                    |                               |       |
| MECP2_IAI7-4 | Neo-FAM   | 96.2        | 0.060                    | 0.96                          | 0.072 |
| MECP2_IAI7-4 | RPPH1-VIC | 201         | 0.040                    |                               |       |

**D****WT NPCs****MECP2<sup>-/-</sup> NPCs****MECP2 / Nestin**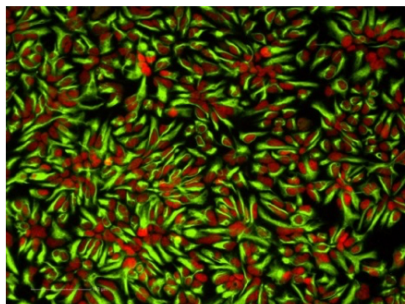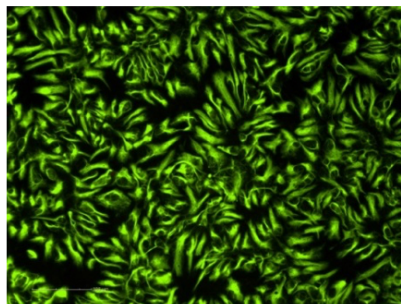

Supplement: pone.0212553.s006.pdf [file pone.0212553.s006.pdf]
